# Supplementary material for: Phylogenomic analysis of UDP glycosyltransferase 1 multigene family in Linum usitatissimum identified genes with varied expression patterns
Source: BMC Genomics. 2012 May 8;13:175. doi: 10.1186/1471-2164-13-175 (PMC3412749; doi:10.1186/1471-2164-13-175)
Supplement: Additional file 5 — Figure S1. Complete amino acid alignment of 137 Flax, 19 Arabidopsis and 1 Sesame UGTs. [file 1471-2164-13-175-S5.pdf]

Complete amino acid alignment of 137 Flax, 19 Arabidopsis and 1 Sesame UGTs

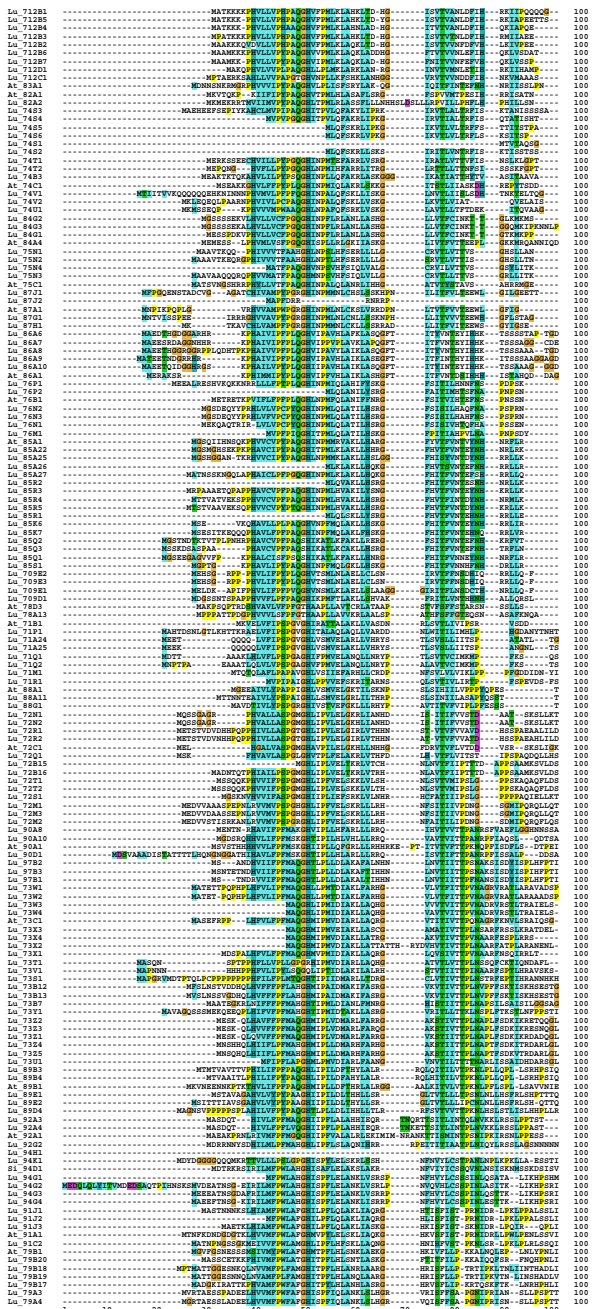

[illegible]

[illegible]

[illegible]

[illegible]

[illegible]

[illegible]
